# Supplementary material for: Interferon-regulatory factor-1 (IRF1) regulates bevacizumab induced autophagy
Source: PubMed Central journal article supplement (PMC4741619; doi:10.18632/oncotarget.5491), 2015-09-05
Supplement: oncotarget-06-31479-s001.pdf [file oncotarget-06-31479-s001.pdf]

# Interferon-regulatory factor-1 (IRF1) regulates bevacizumab induced autophagy

## Supplementary Material

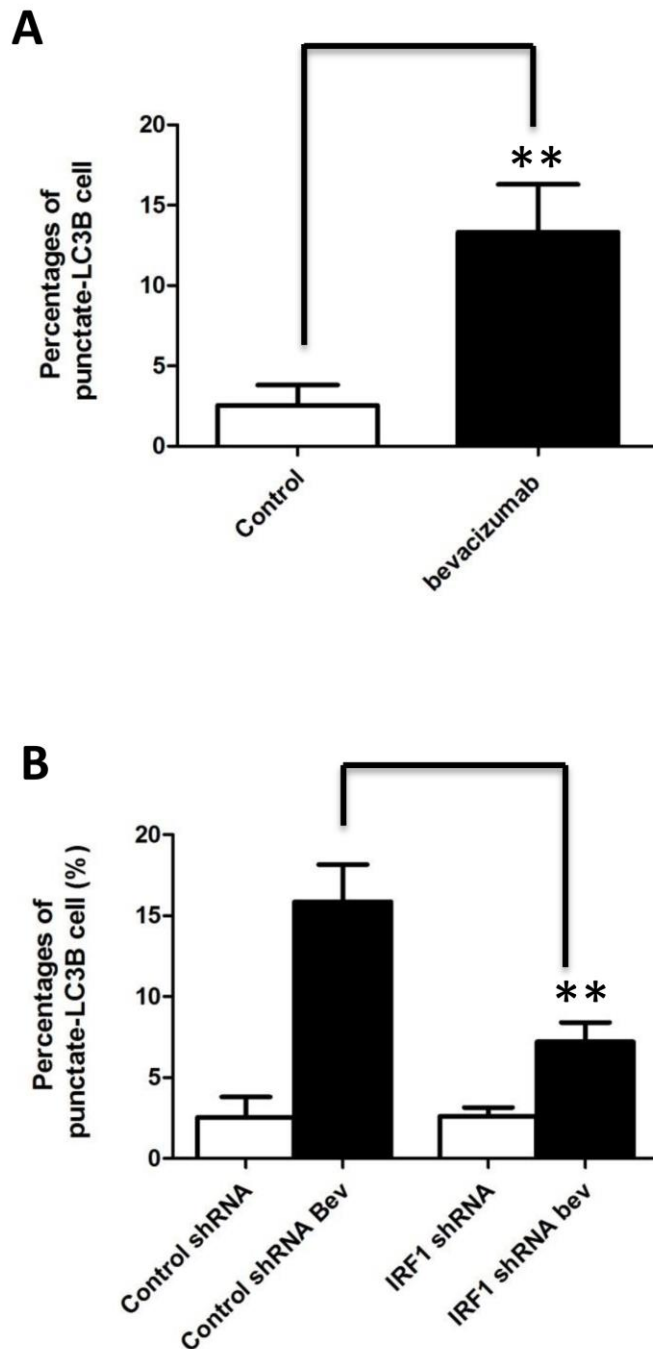

**Supplemental Figure 1: Quantified data of LC3 immunofluorescence staining.** **A.**, The punctuated LC3 staining was increased by bevacizumab. **B.**, IRF1 depletion reduced bevacizumab-induced LC3 punctate staining. \*\*:  $P < 0.01$ ,  $P$  values were determined by Student's  $t$  test.

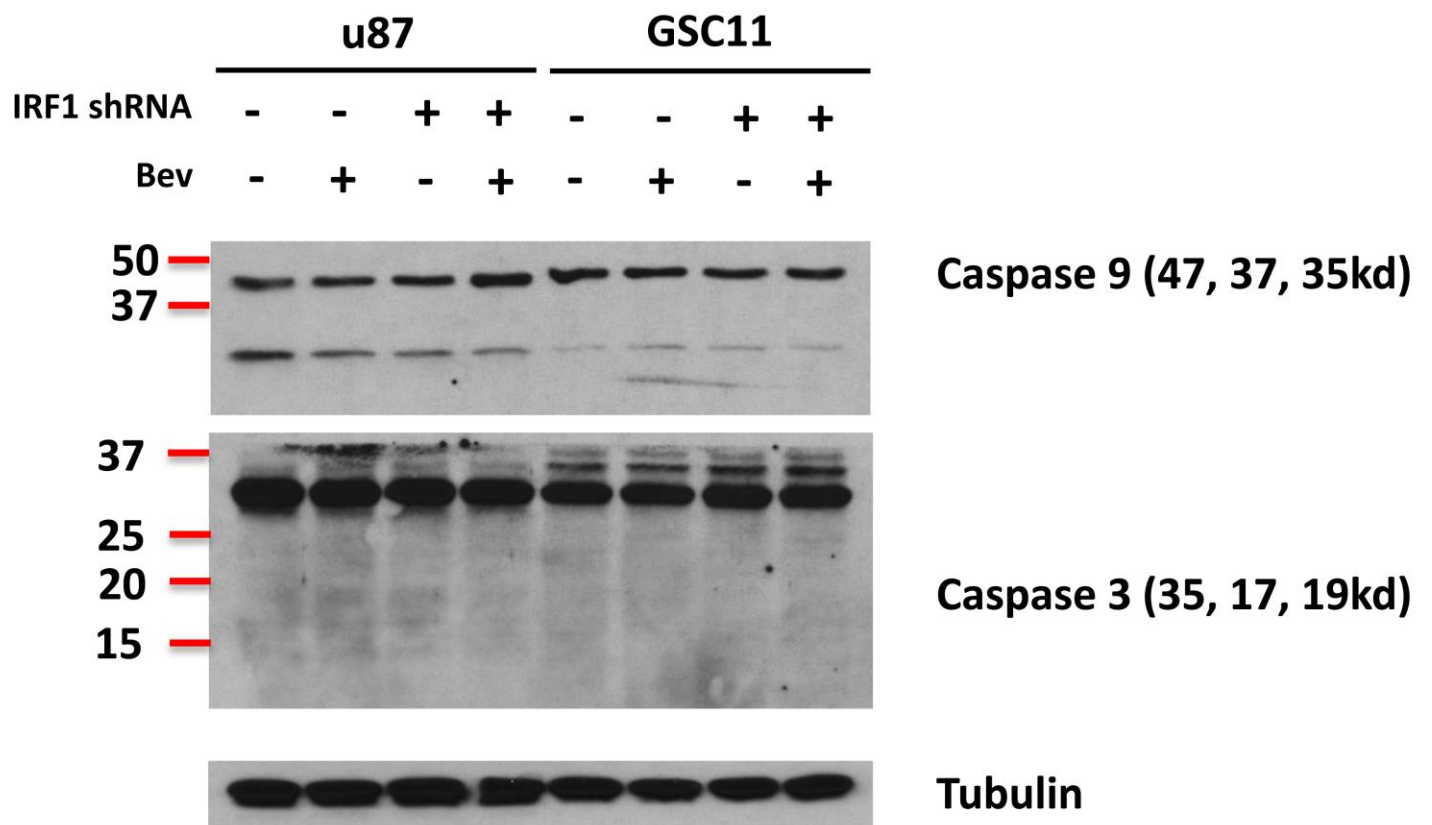

**Supplemental Figure 2: Bevacizumab and IRF1 depletion do not affect the expressions of caspase 3 and caspase 9.**
